# Supplementary material
Source: PubMed Central journal article supplement (PMC8405194)
Supplement: advancesADV2021004515-suppl1.pdf [file advancesADV2021004515-suppl1.pdf]

# Clinicopathological features and survival in EBV-positive diffuse large B-cell lymphoma not otherwise specified

## SUPPLEMENTARY FIGURES LEGENDS

**Figure S1.** Hans algorithm for EBV<sup>+</sup> DLBCL-NOS cell-of-origin, according to histological pattern. (A) Polymorphic EBV<sup>+</sup> DLBCL-NOS and (B) monomorphic EBV<sup>+</sup> DLBCL-NOS.

DLBCL-NOS: diffuse large B-cell lymphoma not otherwise specified; GCB: Germinal Center B; MUM1: multiple myeloma oncogene 1; non-GC: non-Germinal Center B.

**Figure S2.** Distribution of EBV<sup>+</sup> DLBCL-NOS cases per histological pattern. The age distribution of (A) EBV<sup>+</sup> DLBCL-NOS with polymorphic pattern (n=46) and (B) EBV<sup>+</sup> DLBCL-NOS with monomorphic pattern (n=21) follow a bimodal distribution.

DLBCL-NOS: diffuse large B-cell lymphoma not otherwise specified.

**Figure S3.** Survival probabilities for the 70 EBV<sup>+</sup> DLBCL-NOS patients. (A) PFS and (B) OS for the 70 EBV<sup>+</sup> DLBCL-NOS. The survival curves plateau after 2 years. At 5 years, PFS is 52.7% [95% CI, 46.4-58.9] and OS is 54.8% [95% CI, 48.5-61.1].

DLBCL-NOS: diffuse large B-cell lymphoma not otherwise specified; OS: overall survival; PFS: progression free survival.

**Figure S4.** Survival probabilities of EBV<sup>+</sup> DLBCL-NOS according to clinicopathological characteristics (70 patients). PFS and OS for all 70 EBV<sup>+</sup> DLBCL-NOS according to (A-B) age group, (C-D) presence of HLH and (E-F) histological pattern.

DLBCL-NOS: diffuse large B-cell lymphoma not otherwise specified; HLH: hemophagocytic lymphohistiocytosis; OS: overall survival; PFS: progression free survival.

**Figure S5.** Survival probabilities of EBV<sup>+</sup> DLBCL-NOS according to clinicopathological characteristics (56 patients with curative-intent therapy). PFS and OS for the 56 EBV<sup>+</sup> DLBCL-NOS with intent-to-cure therapy according to (A-B) age group, (C-D) presence of HLH and (E-F) histological pattern.

DLBCL-NOS: diffuse large B-cell lymphoma not otherwise specified; HLH: hemophagocytic lymphohistiocytosis; OS: overall survival; PFS: progression free survival.

**Figure S6.** Flow chart for the EBV<sup>+</sup> DLBCL-NOS control cohort.

DLBCL-NOS: diffuse large B-cell lymphoma not otherwise specified; EBER: EBV-encoded small RNAs; ISH: in situ hybridation.

**Figure S7. Distribution of EBV<sup>+</sup> DLBCL-NOS and EBV<sup>-</sup> DLBCL-NOS cases treated with curative intent per age group.**

The age distribution of (A) EBV<sup>+</sup> DLBCL-NOS (n=56) peaks in the seventh decade of life, while distribution of (B) EBV<sup>-</sup> DLBCL-NOS follows a Gaussian curve (n=425).

DLBCL-NOS: diffuse large B-cell lymphoma not otherwise specified.

**Figure S8. Survival probabilities of EBV<sup>+</sup> DLBCL-NOS vs EBV<sup>-</sup> DLBCL with intent to cure therapy according to age group.**

PFS and OS of EBV<sup>+</sup> DLBCL-NOS compared with EBV<sup>-</sup> DLBCL-NOS according to age group: (A-B)  $\leq$  50 years and (C-D)  $>$  50 years. In young patient, PFS at 5 years of EBV<sup>+</sup> DLBCL-NOS vs EBV<sup>-</sup> DLBCL-NOS is 91.3% [95% CI, 85.4-97.2] and 69% [95% CI, 62-76] respectively (p = .066). OS of EBV<sup>+</sup> DLBCL-NOS vs EBV<sup>-</sup> DLBCL-NOS at 5 years is 91.3% [95% CI, 85.4-97.2] and 83.8% [95% CI, 78-89.6] respectively (p = .438). In elderly, PFS at 5 years of EBV<sup>+</sup> DLBCL-NOS vs EBV<sup>-</sup> DLBCL-NOS is 47.9% [95% CI, 33.7-68.7] and 45.8% [95% CI, 40-53.4] respectively (p = .405). OS of EBV<sup>+</sup> DLBCL-NOS vs EBV<sup>-</sup> DLBCL-NOS at 5 years is 53% [95% CI, 38.2-74] and 60.8% [95% CI, 55.4-69.3] respectively (p = .038).

DLBCL-NOS: diffuse large B-cell lymphoma not otherwise specified; OS: overall survival; PFS: progression free survival.

Figure S1.

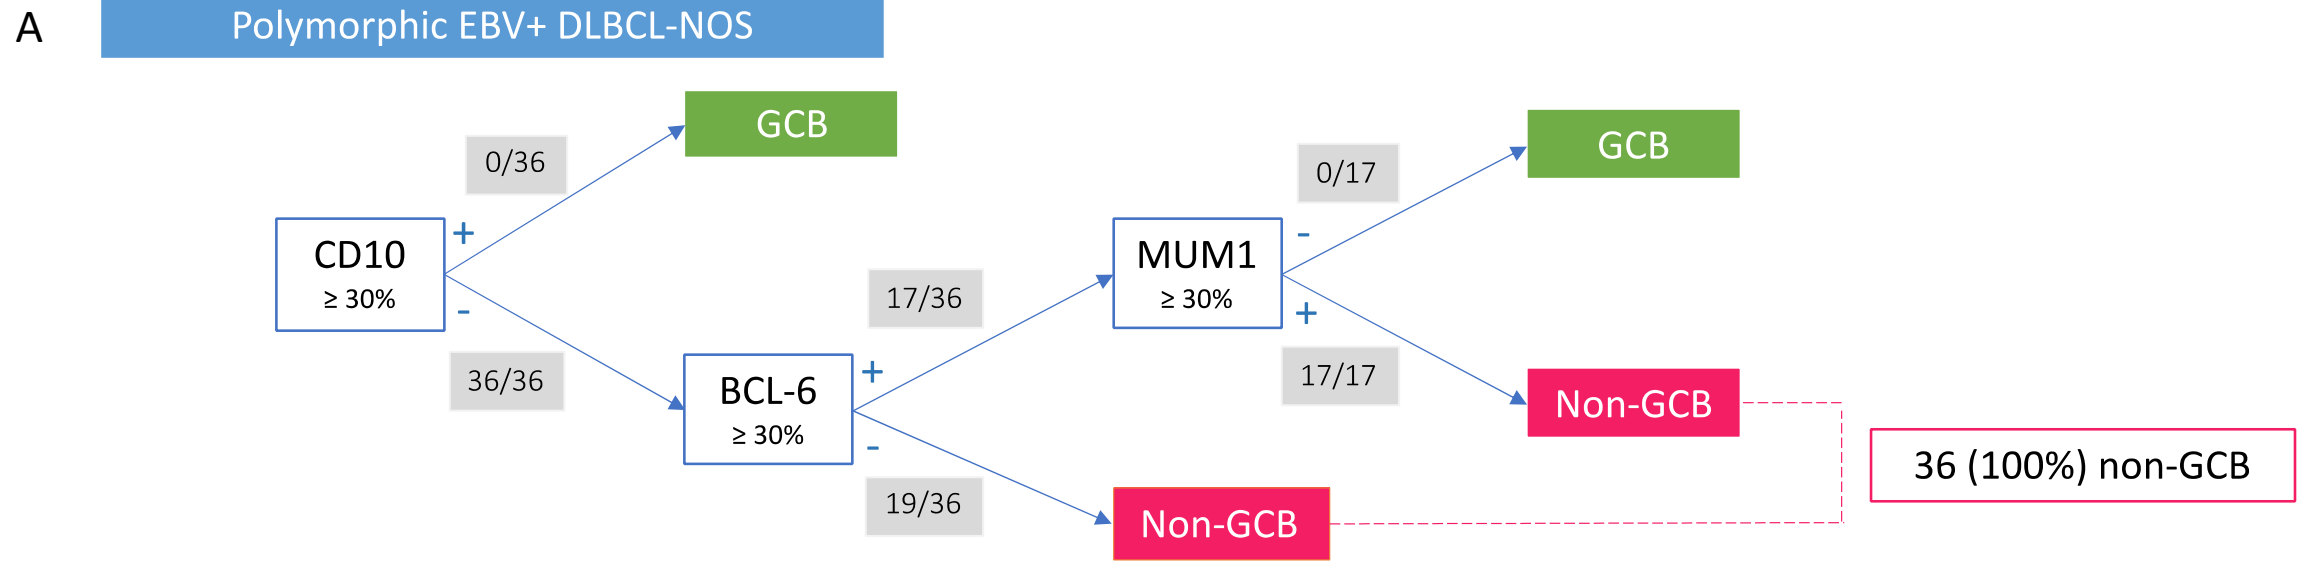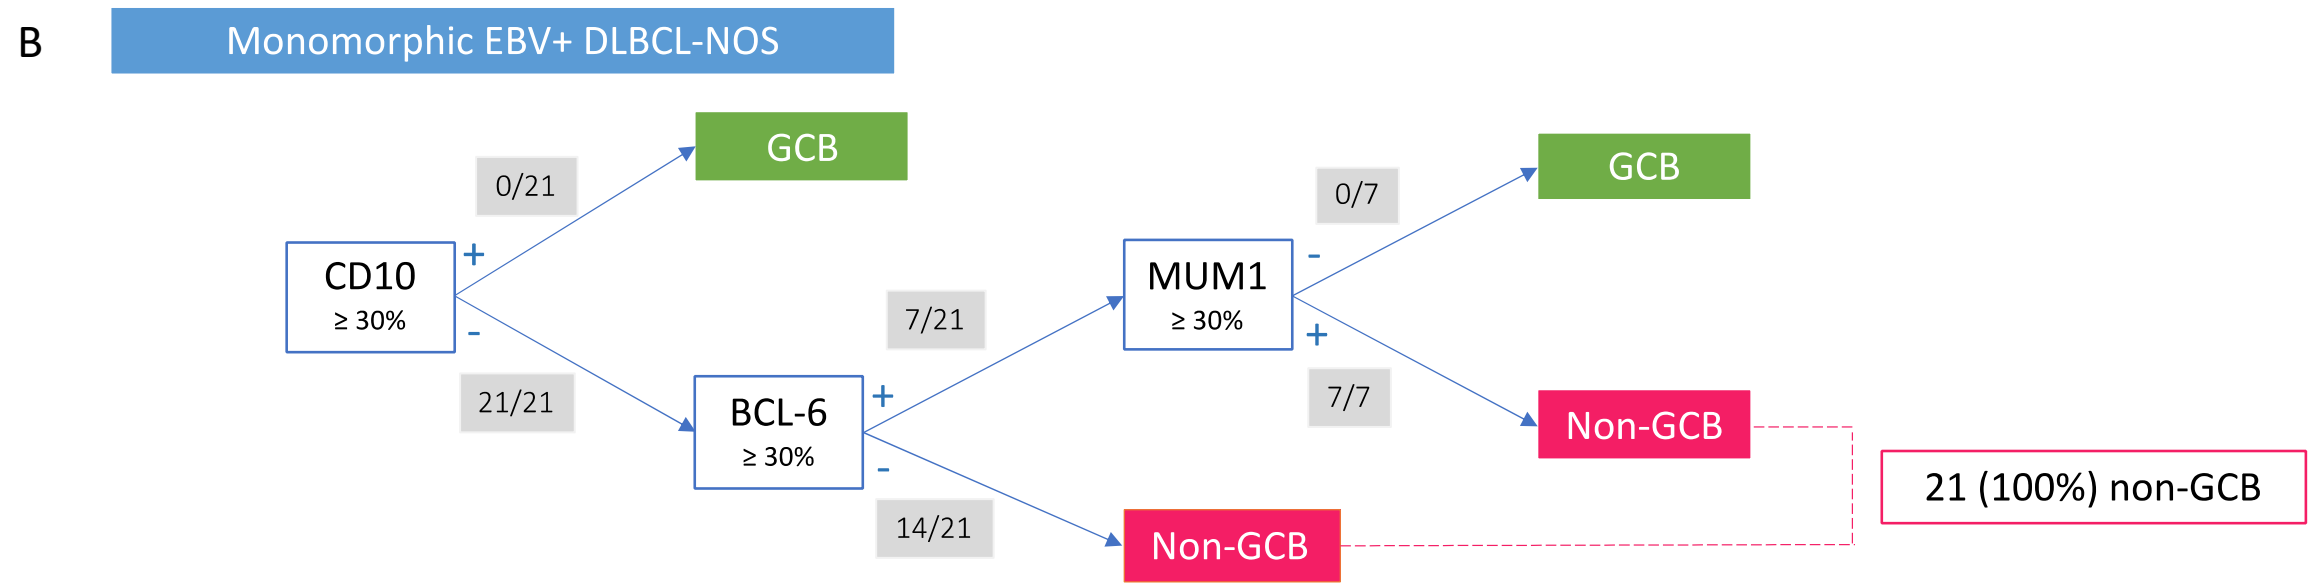

Figure S2.

A.

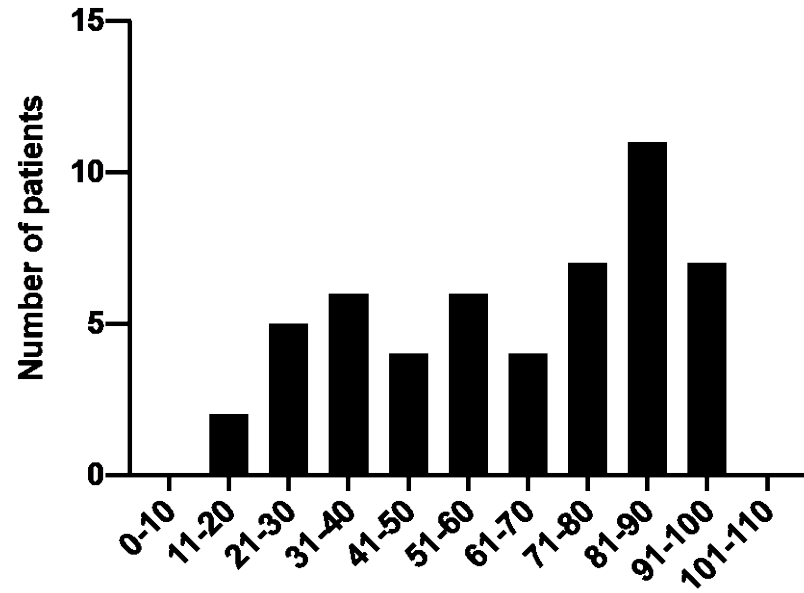

Age group in EBV+ DLBCL-NOS with polymorphic pattern (n=46)

B.

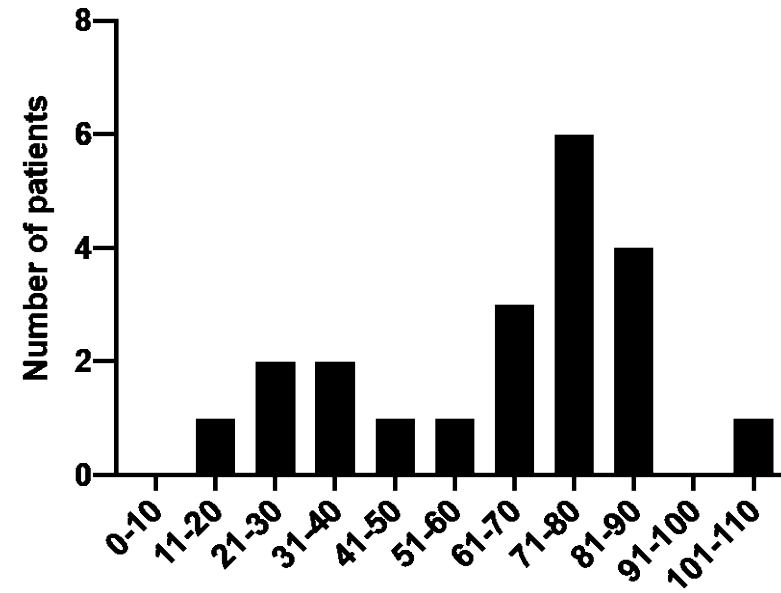

Age group in EBV+ DLBCL-NOS with monomorphic pattern (n=21)

Figure S3.

A

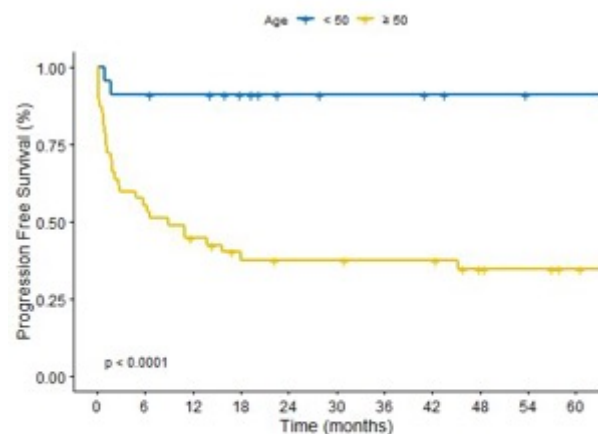

Number at risk

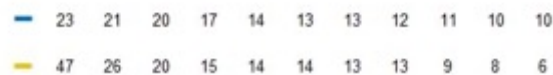

B

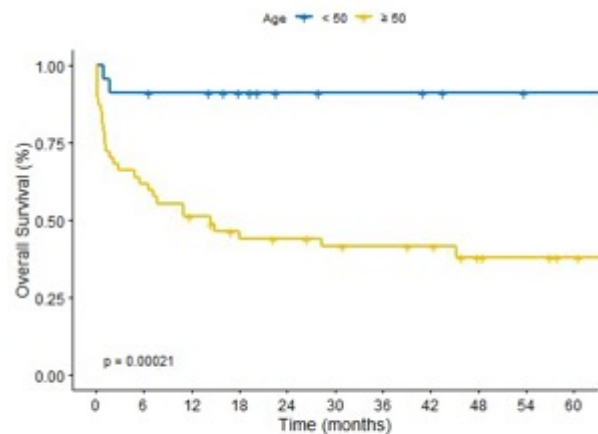

Number at risk

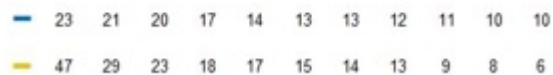

C

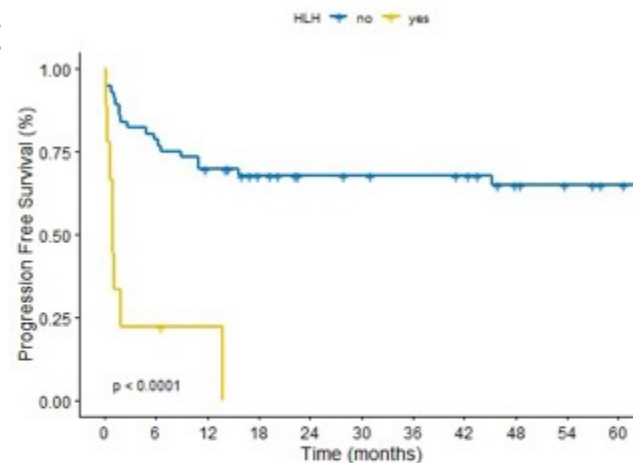

Number at risk

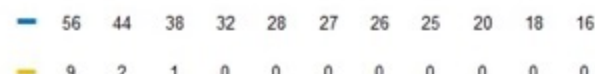

D

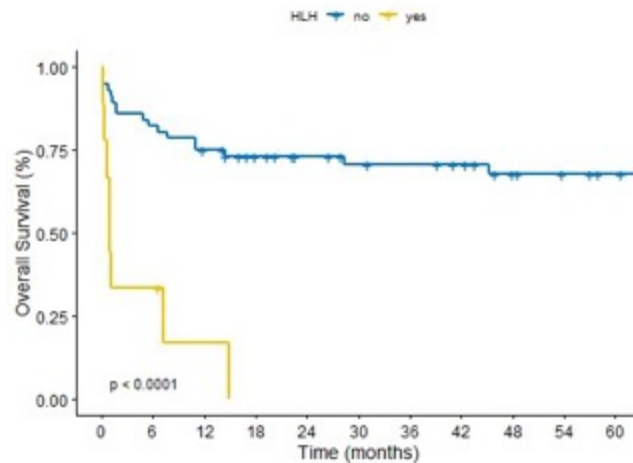

Number at risk

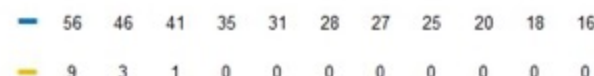

E

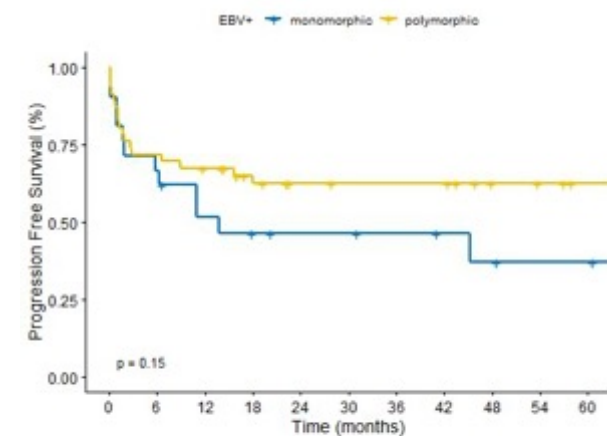

Number at risk

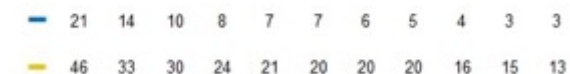

F

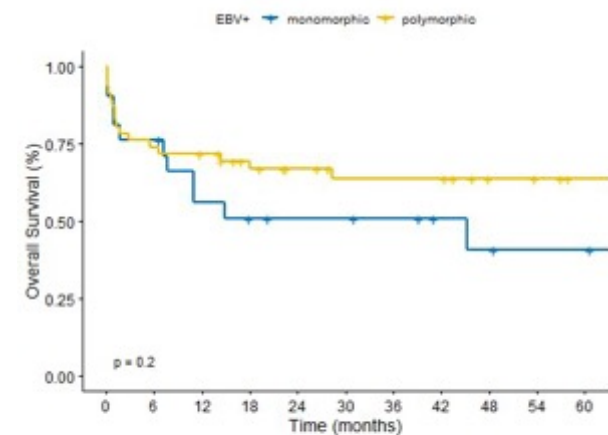

Number at risk

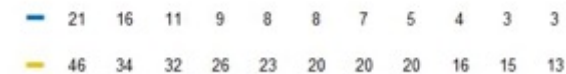

Figure S4.

A

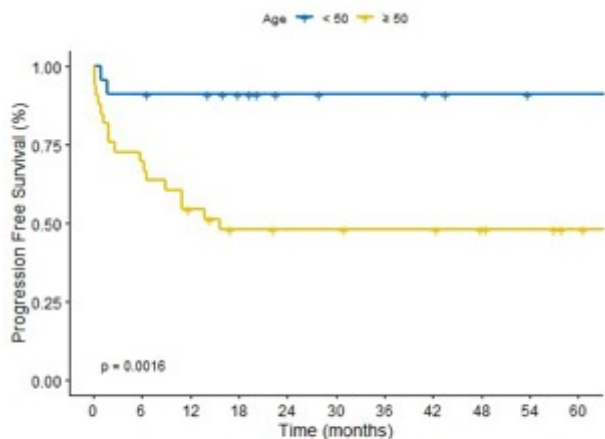

Number at risk

|   |    |    |    |    |    |    |    |    |    |    |    |
|---|----|----|----|----|----|----|----|----|----|----|----|
| — | 23 | 21 | 20 | 17 | 14 | 13 | 13 | 12 | 11 | 10 | 10 |
| — | 33 | 23 | 17 | 13 | 12 | 12 | 11 | 11 | 9  | 8  | 6  |

B

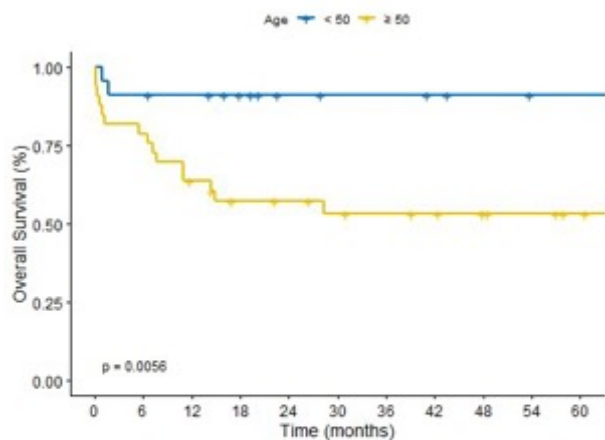

Number at risk

|   |    |    |    |    |    |    |    |    |    |    |    |
|---|----|----|----|----|----|----|----|----|----|----|----|
| — | 23 | 21 | 20 | 17 | 14 | 13 | 13 | 12 | 11 | 10 | 10 |
| — | 33 | 26 | 20 | 16 | 15 | 13 | 12 | 11 | 9  | 8  | 6  |

C

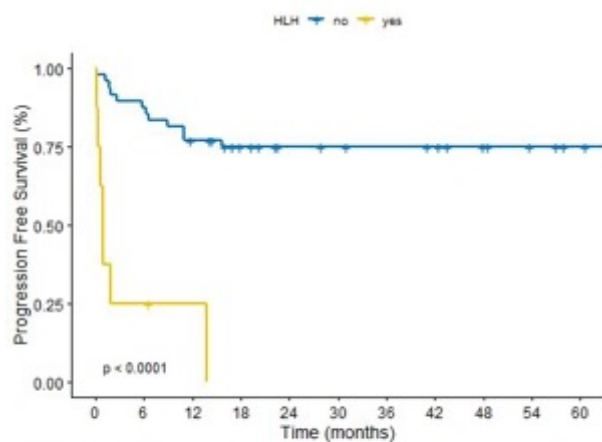

Number at risk

|   |    |    |    |    |    |    |    |    |    |    |    |
|---|----|----|----|----|----|----|----|----|----|----|----|
| — | 48 | 42 | 36 | 30 | 26 | 25 | 24 | 23 | 20 | 18 | 16 |
| — | 8  | 2  | 1  | 0  | 0  | 0  | 0  | 0  | 0  | 0  | 0  |

D

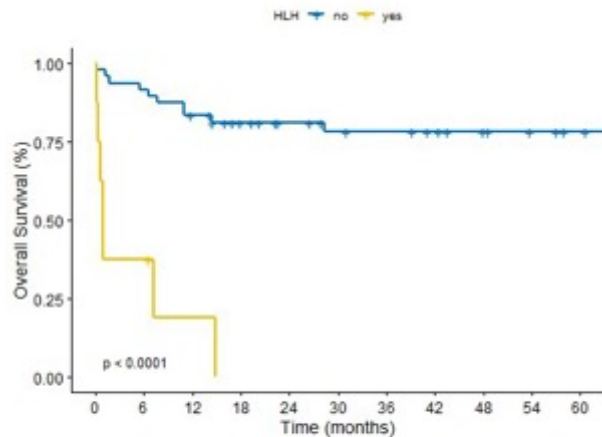

Number at risk

|   |    |    |    |    |    |    |    |    |    |    |    |
|---|----|----|----|----|----|----|----|----|----|----|----|
| — | 48 | 44 | 39 | 33 | 29 | 26 | 25 | 23 | 20 | 18 | 16 |
| — | 8  | 3  | 1  | 0  | 0  | 0  | 0  | 0  | 0  | 0  | 0  |

E

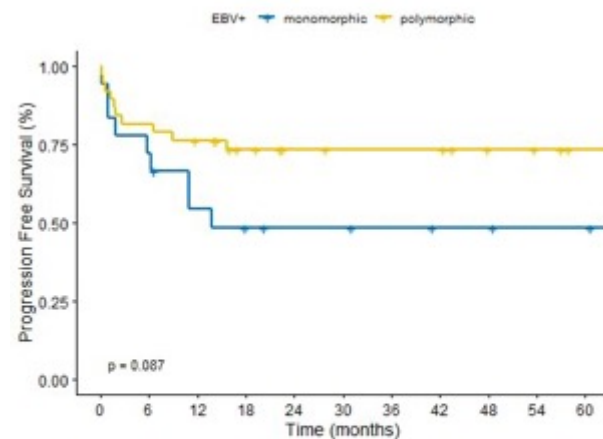

Number at risk

|   |    |    |    |    |    |    |    |    |    |    |    |
|---|----|----|----|----|----|----|----|----|----|----|----|
| — | 18 | 13 | 9  | 7  | 6  | 6  | 5  | 4  | 4  | 3  | 3  |
| — | 38 | 31 | 28 | 23 | 20 | 19 | 19 | 19 | 16 | 15 | 13 |

F

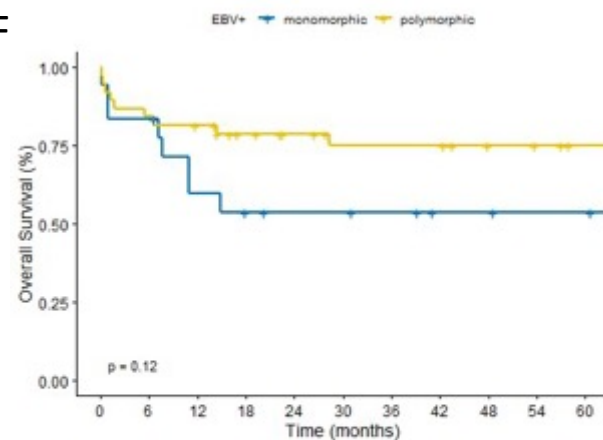

Number at risk

|   |    |    |    |    |    |    |    |    |    |    |    |
|---|----|----|----|----|----|----|----|----|----|----|----|
| — | 18 | 15 | 10 | 8  | 7  | 7  | 6  | 4  | 4  | 3  | 3  |
| — | 38 | 32 | 30 | 25 | 22 | 19 | 19 | 19 | 16 | 15 | 13 |

Figure S5.

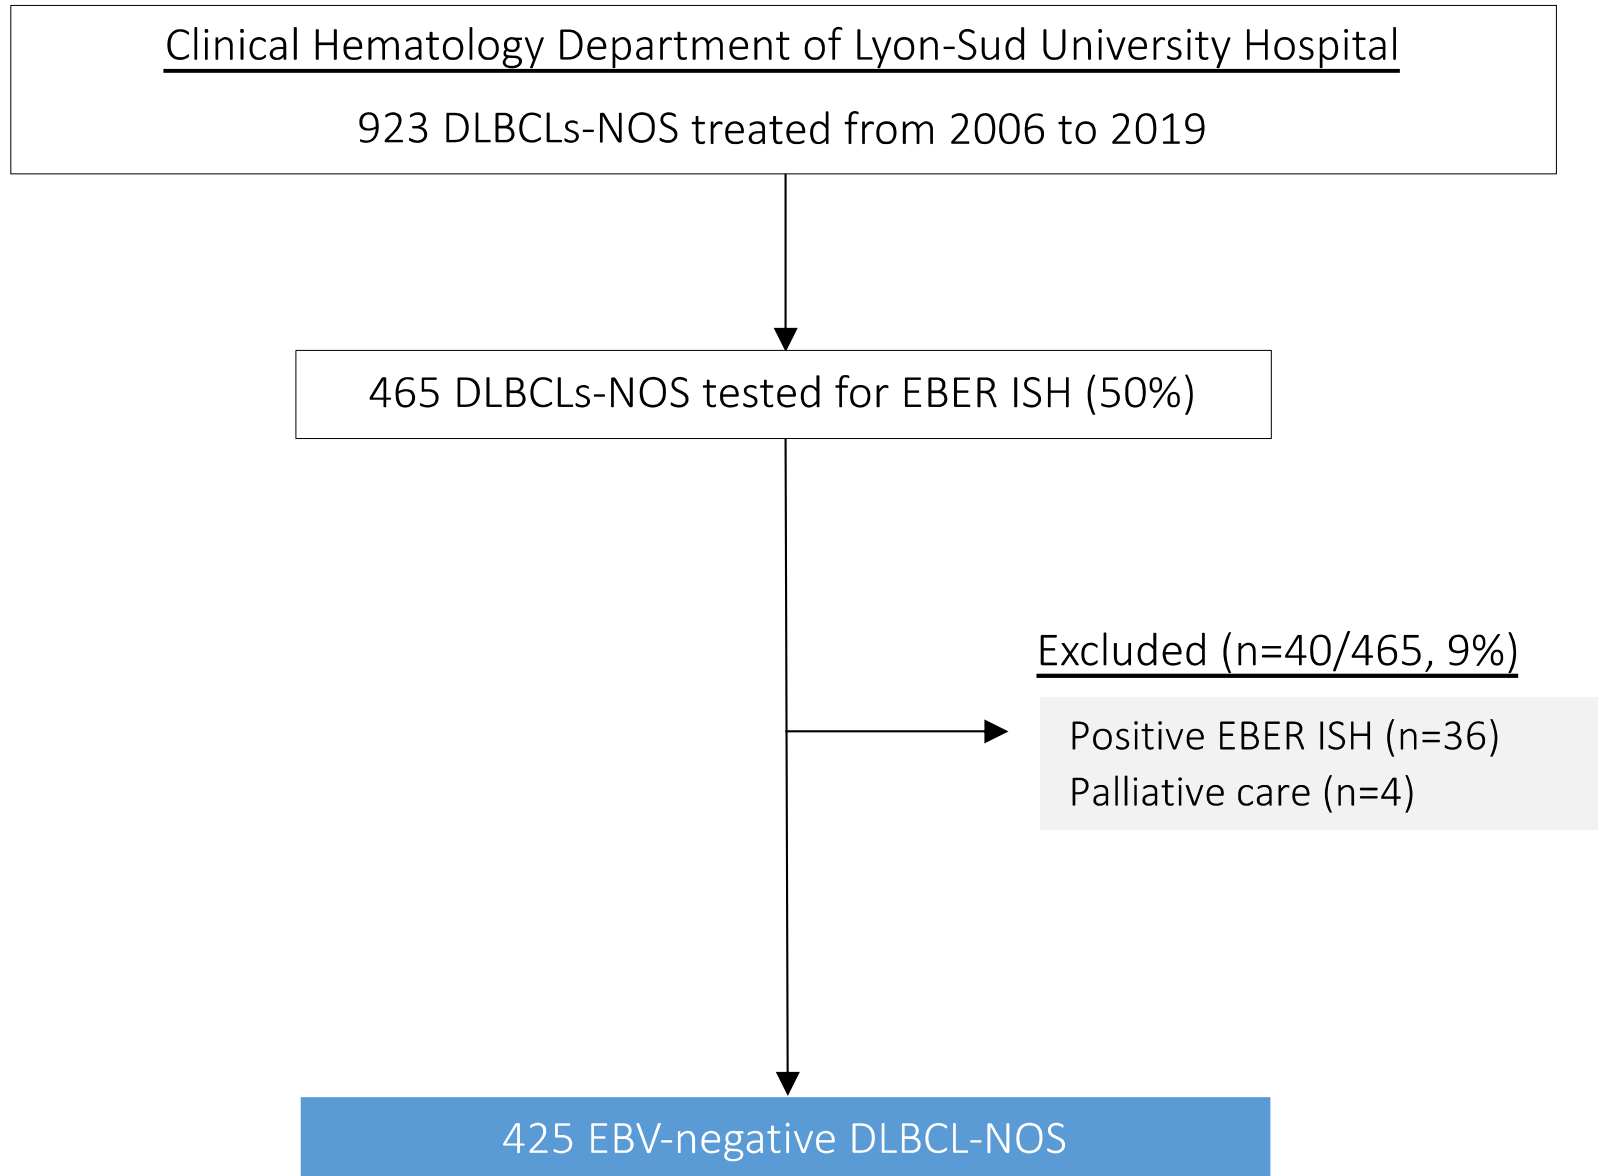

Figure S6.

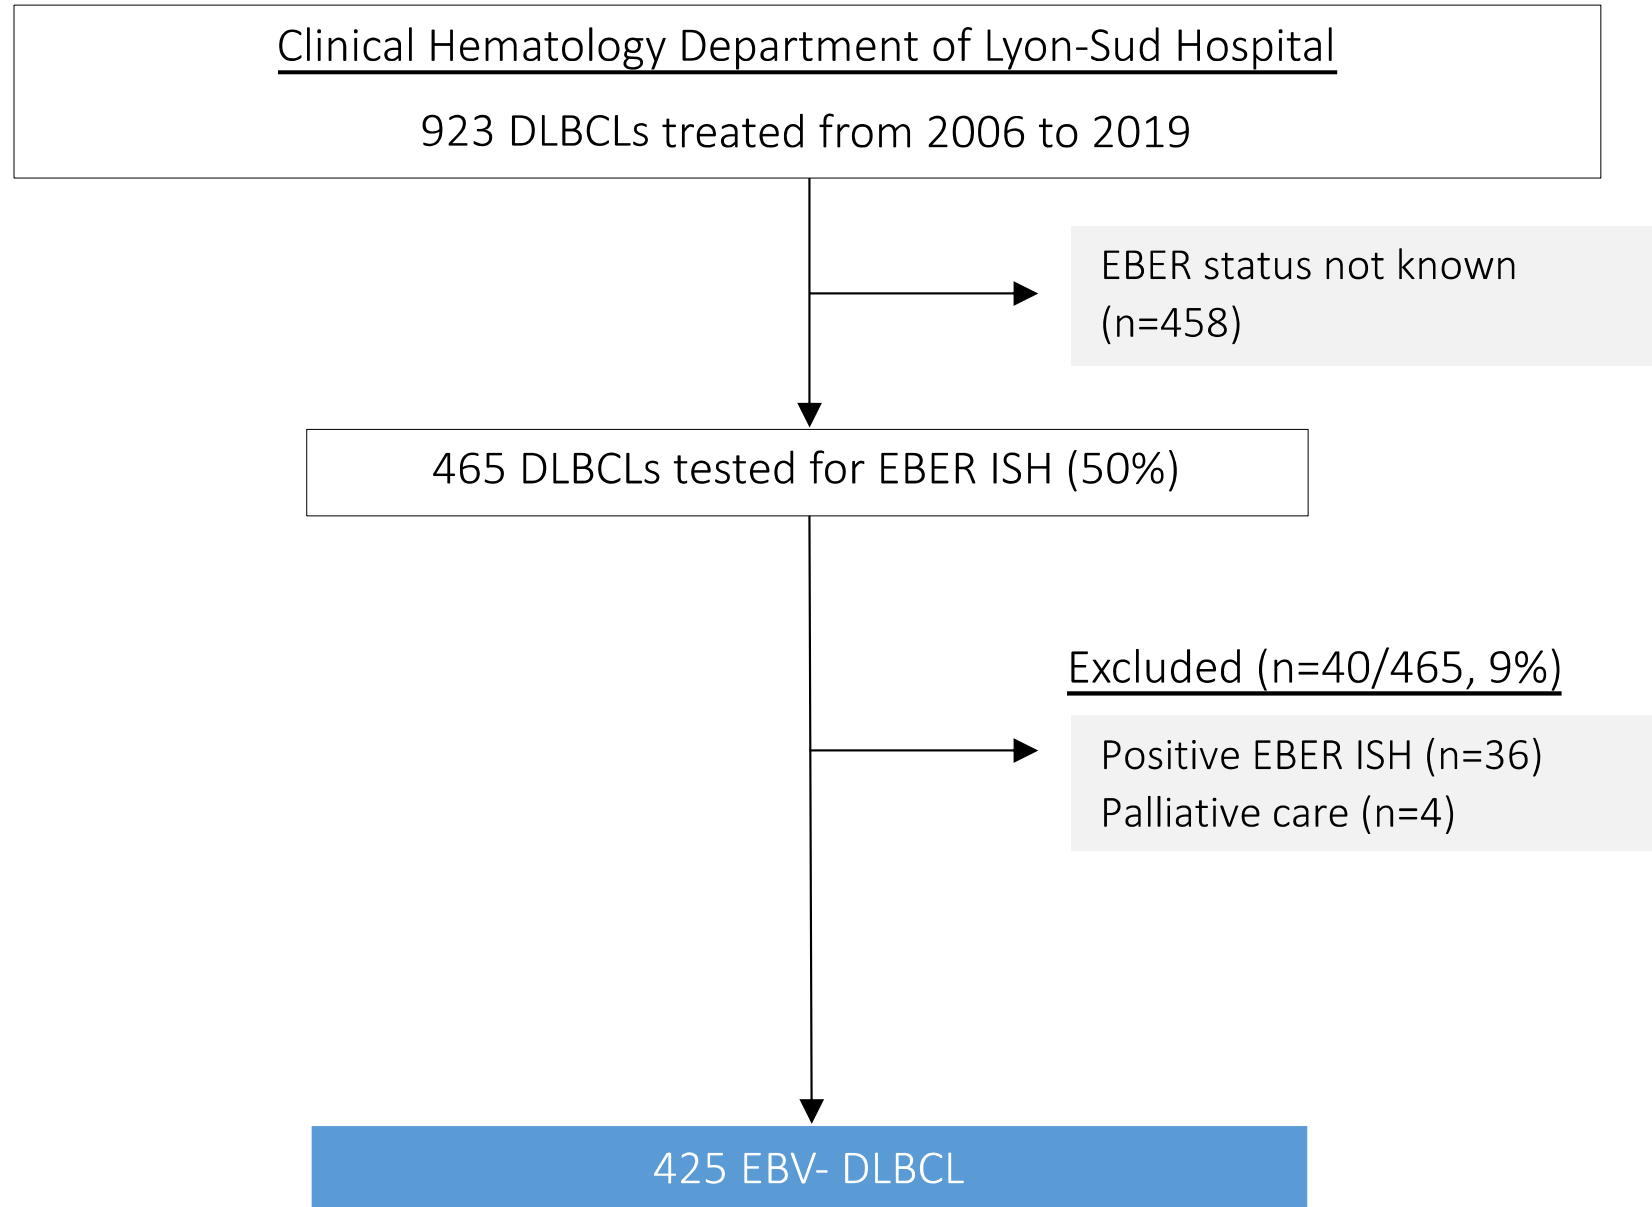



Figure S7.

A

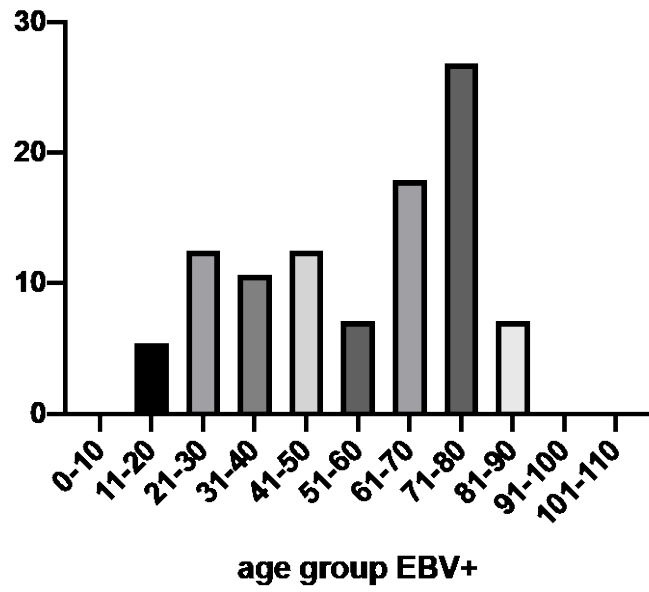

B

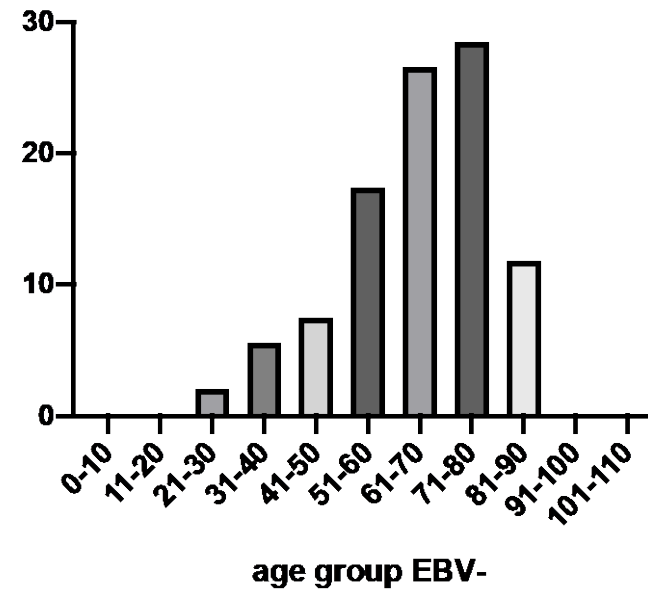

Figure S8.

A

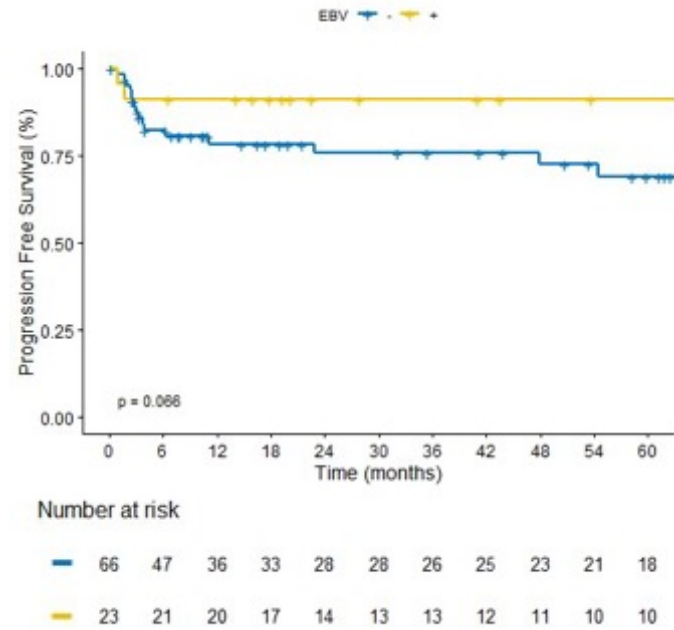

B

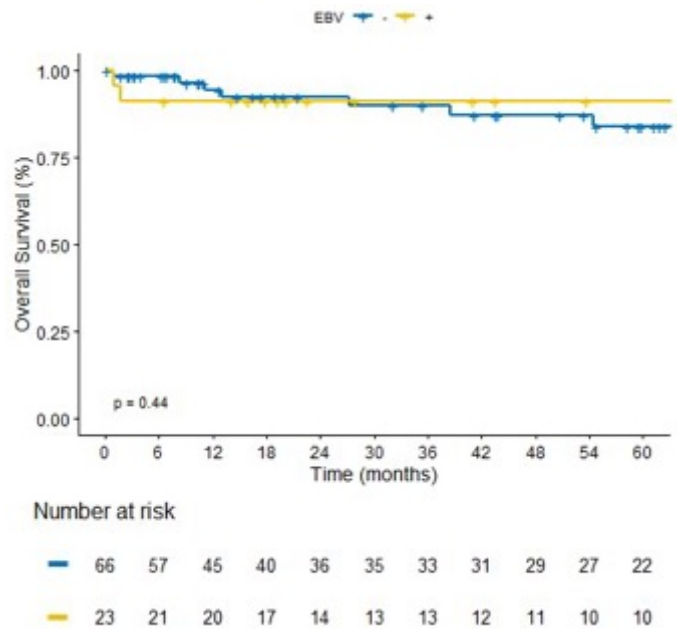

C

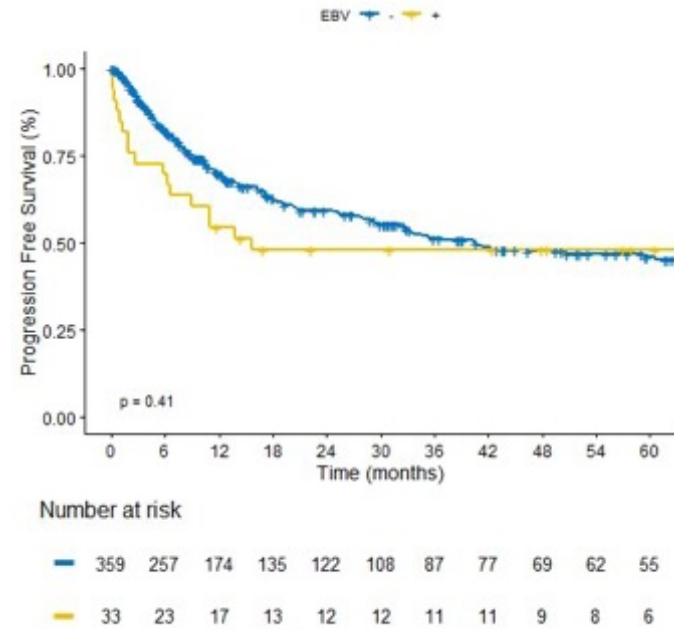

D

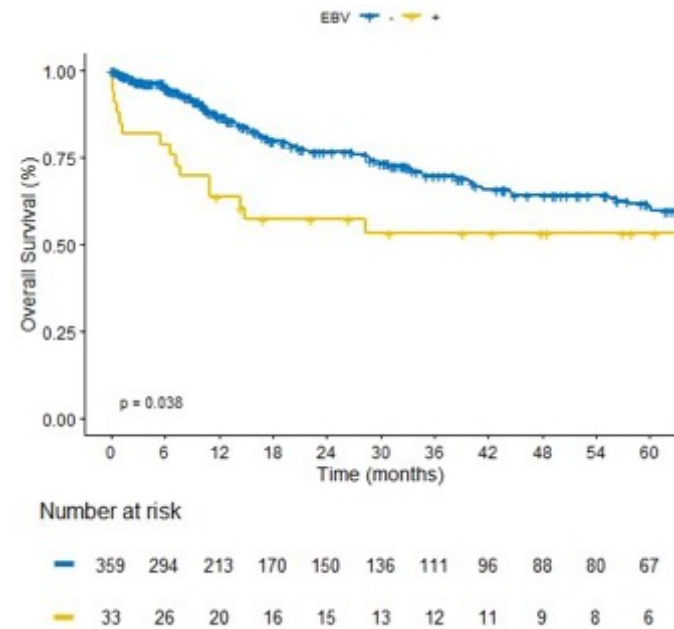

SUPPLEMENTARY TABLES

**Table S1. Prevalence and comparative survival of EBV<sup>+</sup> DLBCL-NOS vs EBV<sup>-</sup> DLBCL-NOS, according to different geographical areas and EBER cutoffs.**

| AUTHORS                  | YEAR | COUNTRY               | DLBCL EBV <sup>+</sup> /EBV <sup>-</sup> | PREVALENCE | AGE (year) | EBER CUTOFF | MEDIANE OS OF EBV <sup>+</sup> vs EBV <sup>-</sup> DLBCL-NOS (months) |
|--------------------------|------|-----------------------|------------------------------------------|------------|------------|-------------|-----------------------------------------------------------------------|
| <b>ASIA</b>              |      |                       |                                          |            |            |             |                                                                       |
| KUZE                     | 2000 | Japan                 | 13/101                                   | 11.4%      | NS         | NS          | -                                                                     |
| PARK                     | 2007 | Korea                 | 34/346                                   | 8.9%       | ≥18        | 20%         | 35.8 vs NR, P = .026                                                  |
| OYAMA                    | 2007 | Japan                 | 96/1696                                  | 5.4%       | >40        | 50%         | 25 vs NR*, P < .001                                                   |
| WADA                     | 2011 | Japan                 | 16/468                                   | 3.3%       | NR         | 20%         | -                                                                     |
| AHN                      | 2013 | Korea                 | 18/204                                   | 8.1%       | ≥50        | 10%         | 42 vs 74*, P = .627                                                   |
| PAN                      | 2013 | China                 | 8/204                                    | 3.8%       | >50        | 50%         | -                                                                     |
| CHANG                    | 2014 | Taiwan                | 15/317                                   | 4.5%       | NS         | 10%         | 5 vs 39.3, P = .058                                                   |
| SATO                     | 2014 | Japan                 | 14/225                                   | 5.9%       | NS         | 30%         | 8.7 vs NR, P < .0001                                                  |
| LU CH                    | 2014 | Taiwan                | 15/74                                    | 16.9%      | NS         | 20%         | 17.7 vs NR, P = .276                                                  |
| LIANG                    | 2015 | China                 | 24/208                                   | 1.3%       | NS         | 50%         | 26 vs NR *, P = .03                                                   |
| LU TX                    | 2015 | China                 | 26/224                                   | 1.4%       | NS         | 50%         | 37 vs NR, P < .0021                                                   |
| OKAMOTO                  | 2015 | Japan                 | 8/115                                    | 6.5%       | >18        | 20%         | -                                                                     |
| CHUANG                   | 2015 | Taiwan                | 10/164                                   | 5.7%       | >60        | 10%         | 16 vs 30*, P = .00056                                                 |
| HONG JY                  | 2015 | Korea                 | 48/523                                   | 8.4%       | NS         | 20%         | 17.3 vs. 192.6, P < .001                                              |
| OHASHI                   | 2017 | Japan                 | 30/604                                   | 4.7%       | NS         | 80%         | 100 vs NR, P < .01                                                    |
| OKAMOTO                  | 2017 | Japan                 | 11/123                                   | 8.9%       | NS         | 20%         | NR for both, P = .001                                                 |
| KATAOKA                  | 2019 | Japan                 | 27/48                                    | -          | NS         | NS          | -                                                                     |
| NAN                      | 2020 | China                 | 14/90                                    | 13.5       | NS         | 50%         | 12 vs 20*, P = .039                                                   |
| <b>LATIN AMERICA</b>     |      |                       |                                          |            |            |             |                                                                       |
| MORALES                  | 2010 | Peru                  | 11/63                                    | 14.9%      | >18        | NS          | 7 vs 47, P = .001                                                     |
| HOFSCHEIER               | 2011 | Mexico                | 9/127                                    | 6.6%       | >50        | majority    | -                                                                     |
| BELTRAN                  | 2011 | Peru                  | 28/171                                   | 14%        | >50        | 20%         | -                                                                     |
| BELTRAN                  | 2011 | Peru                  | 3/134                                    | 2.2%       | <50        | 10%         | -                                                                     |
| COHEN                    | 2014 | Argentina             | 7/68                                     | 9.3%       | NS         | 20%         | -                                                                     |
| BELTRAN                  | 2017 | Peru                  | 33/84                                    | 28%        | >18        | 20%         | -                                                                     |
| <b>WESTERN COUNTRIES</b> |      |                       |                                          |            |            |             |                                                                       |
| HOELLER                  | 2010 | Switzerland and Italy | 8/250                                    | 3.1%       | ≥50        | 10%         | -                                                                     |
| UNER                     | 2011 | Turkey                | 12/245                                   | 4.7%       | >50        | majority    | 8 vs 84*, P < .001                                                    |
| HOFSCHEIER               | 2011 | Germany               | 4/165                                    | 2.4%       | >50        | majority    | -                                                                     |
| OK                       | 2014 | USA                   | 28/675                                   | 4.1%       | NS         | 10%         | 50 vs 92*, P = .189                                                   |
| SLACK                    | 2014 | USA                   | 11/374                                   | 2.9%       | >50        | majority    | -                                                                     |
| NICOLAE                  | 2015 | USA                   | 46                                       | -          | <45        | 90%         | -                                                                     |
| NAEINI                   | 2016 | USA                   | 37/530                                   | 5.8%       | NS         | 10%         | -                                                                     |
| TRACY                    | 2018 | USA                   | 16/346                                   | 4.4%       | NS         | 30%         | 129 vs 143, P = .97                                                   |
| WITTE                    | 2020 | Germany               | 80/314                                   | -          | NS         | 50%         | NR for both, P = .116                                                 |
| <b>AFRICA</b>            |      |                       |                                          |            |            |             |                                                                       |
| CASSIM                   | 2020 | South Africa          | 9/131                                    | 7%         | NS         | 80%         | -                                                                     |

DLBCL: diffuse large B-cell lymphoma; EBER: EBV-encoded small RNAs; NR: not reach; NS: not specified; OS: overall survival.

\*estimated from Kaplan-Meier curves

**Table S2. Geographical origin of the 70 EBV<sup>+</sup> DLBCL-NOS cases included in the cohort.**

| CENTERS                   | NUMBER OF PATIENTS (n=70) |
|---------------------------|---------------------------|
| <b>RHÔNE-ALPES REGION</b> | <b>52 (74%)</b>           |
| Lyon                      | 29                        |
| Saint-Étienne             | 4                         |
| Chambery                  | 4                         |
| Annecy                    | 3                         |
| Grenoble                  | 3                         |
| Valence                   | 2                         |
| Bourgoin-Jallieu          | 2                         |
| Chalon-sur-Saône          | 1                         |
| Dijon                     | 1                         |
| Villefranche-sur-Saône    | 1                         |
| Le Puy en Velay           | 1                         |
| Macon                     | 1                         |
| <b>OTHER REGIONS</b>      | <b>18 (26%)</b>           |
| Lille                     | 4                         |
| Bordeaux                  | 2                         |
| Paris                     | 2                         |
| Rennes                    | 2                         |
| Pontoise                  | 1                         |
| Nancy                     | 1                         |
| Nantes                    | 1                         |
| Liège                     | 1                         |
| Strasbourg                | 1                         |
| Le Mans                   | 1                         |
| Nimes                     | 1                         |
| Martinique                | 1                         |

**Table S3.** Panel of antibodies, clone and positivity cut-off used for EBV<sup>+</sup> DLBCL-NOS diagnosis.

| Target      | Antibody                     | Clone                 | Positivity cut-off (%) |
|-------------|------------------------------|-----------------------|------------------------|
| Tumor cells | CD20                         | L26, Dako             | 10                     |
|             | CD30                         | BerH2, Dako           | 10                     |
|             | CD15                         | MMA, Ventana Roche    | 10                     |
|             | PAX5                         | SP34, Ventana Roche   | 10                     |
|             | OCT-2                        | MRQ2, Ventana Roche   | 10                     |
|             | BOB1                         | SP92, Ventana Roche   | 10                     |
|             | MUM1                         | MRQ43, Cell marq      | 30                     |
|             | CD10                         | SP67, Ventana Roche   | 30                     |
|             | BCL-2                        | 124, Ventana Roche    | 50                     |
|             | BCL-6                        | GI191E/A8, Cell marq  | 30                     |
|             | c-MYC                        | Y69, Ventana Roche    | 40                     |
|             | KI67                         | KI67, Dako            | -                      |
|             | CD138                        | BA38, Ventana Roche   | 30                     |
|             | LMP1                         | CS1.4, Agilent        | -                      |
|             | EBNA-2                       | PE2, Abcam            | -                      |
|             | Tumor-microenvironment cells | PD-L1                 | QR1, Quartet           |
| PD-L2       |                              | D7U8C, Cell Signaling | 5                      |
| CD3         |                              | polyclonal, Dako      | -                      |
| PD1         |                              | NAT105, Ventana Roche | 5                      |

EBNA-2: EBV-nuclear antigen 2; LMP1: latent membrane protein 1; MUM1: multiple myeloma oncogene 1; PD-L1/L2: programmed death ligand 1/2, PD1: programmed cell death 1.

**Table S4. Immunophenotype of EBV<sup>+</sup> neoplastic cells according to histological subtype (n=67\*).**

| ANTIBODY                        | POLYMORPHIC (n=46) | MONOMORPHIC (n=21) | P     |
|---------------------------------|--------------------|--------------------|-------|
| <b>CD20</b>                     | 46/46 (100%)       | 21/21 (100%)       | > .99 |
| 0-2                             | 0                  | 0                  |       |
| 3                               | 46/46 (100%)       | 21/21 (100%)       |       |
| <b>PAX5</b>                     | 40/42 (95%)        | 17/17 (100%)       | > .99 |
| <b>OCT-2</b>                    | 37/40 (93%)        | 15/16 (94%)        | > .99 |
| <b>BOB1</b>                     | 32/39 (82%)        | 17/17 (100%)       | .088  |
| <b>CD30</b>                     | 44/45 (98%)        | 21/21 (100%)       | > .99 |
| 0                               | 1/45 (2%)          | 0                  |       |
| 1                               | 1/45 (2%)          | 0                  |       |
| 2                               | 14/45 (31%)        | 20/21 (95%)        |       |
| 3                               | 30/45 (67%)        | 1/21 (5%)          |       |
| <b>CD15</b>                     | 10/44 (23%)        | 0/17 (0%)          | .049  |
| <b>MUM1</b>                     | 41/44 (93%)        | 19/21 (91%)        | > .99 |
| <b>CD10</b>                     | 0/36 (0%)          | 0/21 (0%)          | > .99 |
| <b>BCL-6</b>                    | 19/39 (49%)        | 7/21 (33%)         | .287  |
| <b>COO (Hans <i>et al.</i>)</b> | 35                 | 21                 | > .99 |
| GCB                             | 0                  | 0                  |       |
| Non-GCB                         | 35 (100%)          | 21 (100%)          |       |
| <b>BCL-2</b>                    | 12/36 (33%)        | 5/20 (25%)         | > .99 |
| <b>c-MYC</b>                    | 26/35 (74%)        | 8/19 (42%)         | .037  |
| <b>DOUBLE EXPRESSOR</b>         | 9/35 (26%)         | 4/18 (22%)         | > .99 |
| <b>PD-L1</b>                    | 37/40 (93%)        | 17/17 (100%)       | > .99 |
| <b>PD-L2</b>                    | 7/40 (18%)         | 1/17 (6%)          | .413  |
| <b>LMP1</b>                     | 40/40 (100%)       | 17/17 (100%)       | > .99 |
| <b>EBNA-2</b>                   | 4/40 (10%)         | 3/17 (18%)         | > .99 |

COO: cell of origin; EBNA2: EBV-nuclear antigen 2; GCB: germinal center B; LMP1: latent membrane protein 1; MUM1: multiple myeloma oncogene 1; non-GCB: non germinal center B; PD-L1/L2: programmed death-ligand 1/2.

\*Missing data (for 3 patients, microbiopsy insufficient for histological classification)

**Table S5.** Baseline clinical and biological characteristics in EBV<sup>+</sup> DLBCL-NOS patients according to the presence of an HLH (n=65\*).

| CHARACTERISTICS                 | HLH      | NO HLH   | <i>P</i> |
|---------------------------------|----------|----------|----------|
| <b>TOTAL, n</b>                 | 9        | 56       |          |
| Median age, years               | 66.5     | 68.5     | .733     |
| Age ≤ 50 years                  | 2        | 21       | .474     |
| Age > 50 years                  | 7        | 35       |          |
| Male                            | 8        | 34       | .142     |
| Female                          | 1        | 22       |          |
| <b>INVOLVED SITE, n</b>         | 9        | 56       |          |
| Nodal, n (%)                    | 9 (100%) | 54 (96%) | >.99     |
| Extra-nodal, n (%)              | 6 (67%)  | 25 (45%) | .291     |
| 1, n (%)                        | 1 (11%)  | 13 (23%) |          |
| ≥ 2, n (%)                      | 5 (56%)  | 12 (22%) |          |
| <b>CLINICAL STAGE, n</b>        | 9        | 56       |          |
| I-II, n (%)                     | 0        | 13       | .185     |
| III-IV, n (%)                   | 9 (100%) | 43       |          |
| <b>aaIPI, n</b>                 | 9        | 49       |          |
| 0-1, n (%)                      | 0        | 16 (32%) | .052     |
| 2-3, n (%)                      | 9 (100%) | 33 (67%) |          |
| <b>ECOG, n</b>                  | 9        | 56       |          |
| 0-1, n (%)                      | 2 (22%)  | 28 (50%) | .161     |
| 2-5, n (%)                      | 7 (78%)  | 28 (50%) |          |
| <b>B SYMPTOMS, n</b>            | 9        | 55       |          |
| Absent, n (%)                   | 0        | 15 (27%) | .101     |
| Present, n (%)                  | 9 (100%) | 40 (73%) |          |
| <b>LDH, n</b>                   | 9        | 49       |          |
| Normal, n (%)                   | 0        | 15 (31%) | .094     |
| High, n (%)                     | 9 (100%) | 34 (69%) |          |
| <b>HYPOGAMMAGLOBULINEMIA, n</b> | 4        | 47       |          |
| Absent, n (%)                   | 3 (75%)  | 16 (34%) | .140     |
| Present, n (%)                  | 1 (25%)  | 31 (66%) |          |
| <b>EBV LATENCY</b>              | 8        | 47       |          |
| Type II (LMP1+/EBNA2-), n (%)   | 6 (75%)  | 43 (91%) | .206     |
| Type III (LMP1+/EBNA2+), n (%)  | 2 (25%)  | 4 (9%)   |          |

aaIPI: age adjusted International Pronostic Index; ECOG-PS: Eastern Cooperative Oncology Group-Performans Status; EBNA2: EBV nuclear antigen 2; HLH: hemophagocytic lymphohistiocytosis; LDH: lactate dehydrogenase; LMP1: latent membrane protein 1; RT: radiation therapy.

\*Missing data (for 5 patients, clinical data were not sufficient)

**Table S6. Baseline clinical and biological characteristics in EBV<sup>+</sup> DLBCL-NOS patients who underwent core needle biopsy vs those with an excisional biopsy.**

| CHARACTERISTICS                | CORE NEEDLE BIOPSY | EXCISIONAL BIOPSY | P     |
|--------------------------------|--------------------|-------------------|-------|
| <b>TOTAL, n</b>                | 20                 | 50                |       |
| Median age, years              | 69                 | 68.5              | .004* |
| Age ≤ 50 years                 | 4 (20%)            | 19 (38%)          | .172  |
| Age > 50 years                 | 16 (80%)           | 31 (62%)          |       |
| Male                           | 10 (50%)           | 34 (68%)          | .181  |
| Female                         | 10 (50%)           | 16 (32%)          |       |
| <b>INVOLVED SITE, n</b>        | 18                 | 49                |       |
| Nodal, n (%)                   | 15 (83%)           | 49 (100%)         | .017* |
| Extra-nodal, n (%)             | 13 (72%)           | 19 (39%)          | .026* |
| <b>CLINICAL STAGE, n</b>       | 18                 | 49                |       |
| I-II, n (%)                    | 1 (6%)             | 13 (27%)          | .090  |
| III-IV, n (%)                  | 17 (94%)           | 36 (73%)          |       |
| <b>aalPI, n</b>                | 13                 | 45                |       |
| 0-1, n (%)                     | 2 (15%)            | 14 (31%)          | .318  |
| 2-3, n (%)                     | 11 (85%)           | 31 (69%)          |       |
| <b>ECOG, n</b>                 | 17                 | 49                |       |
| 0-1, n (%)                     | 5 (29%)            | 25 (51%)          | .162  |
| 2-5, n (%)                     | 12 (71%)           | 24 (49%)          |       |
| <b>B SYMPTOMS, n</b>           | 17                 | 48                |       |
| Absent, n (%)                  | 3 (18%)            | 12 (25%)          | .740  |
| Present, n (%)                 | 14 (82%)           | 36 (75%)          |       |
| <b>LDH, n</b>                  | 13                 | 45                |       |
| Normal, n (%)                  | 2 (15%)            | 13 (29%)          | .480  |
| High, n (%)                    | 11 (85%)           | 32 (71%)          |       |
| <b>HLH, n</b>                  | 16                 | 49                |       |
| Absent, n (%)                  | 14 (88%)           | 42 (86%)          | >.99  |
| Present, n (%)                 | 2 (12%)            | 7 (14%)           |       |
| <b>HISTOLOGICAL PATTERN</b>    | 17                 | 50                |       |
| Monomorphic, n (%)             | 8 (47%)            | 13 (26%)          | .135  |
| Polymorphic, n (%)             | 9 (53%)            | 37 (74%)          |       |
| <b>EBV LATENCY</b>             | 7                  | 50                |       |
| Type II (LMP1+/EBNA2-), n (%)  | 5 (71%)            | 45 (90%)          | .202  |
| Type III (LMP1+/EBNA2+), n (%) | 2 (29%)            | 5 (10%)           |       |

aalPI: age adjusted International Pronostic Index; ECOG-PS: Eastern Cooperative Oncology Group-Performans Status; EBNA2: EBV nuclear antigen 2; HLH: hemophagocytic lymphohistiocytosis; LDH: lactate dehydrogenase; LMP1: latent membrane protein 1; RT: radiation therapy.



**Table S7. Baseline clinical and biological characteristics in EBV<sup>+</sup> DLBCL-NOS patients according to histological pattern (n=67\*).**

| CHARACTERISTICS                 | POLYMORPHIC | MONOMORPHIC | P     |
|---------------------------------|-------------|-------------|-------|
| <b>TOTAL, n</b>                 | 46          | 21          |       |
| Median age, years               | 64.5        | 73          | .327  |
| Age ≤ 50 years                  | 17 (37%)    | 6 (29%)     | .587  |
| Age > 50 years                  | 29 (63%)    | 15 (71%)    |       |
| Male                            | 30 (65%)    | 14 (67%)    | > .99 |
| Female                          | 16 (35%)    | 7 (33%)     |       |
| <b>INVOLVED SITE, n</b>         | 43          | 21          |       |
| Nodal, n (%)                    | 43 (100%)   | 19 (91%)    | .104  |
| Extra-nodal, n (%)              | 16 (37%)    | 13 (62%)    | .108  |
| 1, n (%)                        | 8 (19%)     | 5 (24%)     |       |
| ≥ 2, n (%)                      | 8 (19%)     | 8 (38%)     |       |
| <b>CLINICAL STAGE, n</b>        | 43          | 21          |       |
| I-II, n (%)                     | 9 (21%)     | 5 (24%)     | > .99 |
| III-IV, n (%)                   | 34 (79%)    | 16 (76%)    |       |
| <b>aalPI, n</b>                 | 38          | 18          |       |
| 0-1, n (%)                      | 11 (29%)    | 5 (28%)     | > .99 |
| 2-3, n (%)                      | 27 (71%)    | 13 (72%)    |       |
| <b>ECOG, n</b>                  | 42          | 21          |       |
| 0-1, n (%)                      | 22 (52%)    | 8 (38%)     | .423  |
| 2-5, n (%)                      | 20 (48%)    | 13 (62%)    |       |
| <b>B SYMPTOMS, n</b>            | 42          | 20          |       |
| Absent, n (%)                   | 12 (29%)    | 3 (15%)     | .346  |
| Present, n (%)                  | 30 (71%)    | 17 (85%)    |       |
| <b>LDH, n</b>                   | 38          | 18          |       |
| Normal, n (%)                   | 9 (24%)     | 6 (33%)     | .524  |
| High, n (%)                     | 29 (76%)    | 12 (67%)    |       |
| <b>LYMPHOPENIA, n</b>           | 35          | 15          |       |
| Absent, n (%)                   | 13 (37%)    | 3 (20%)     | .328  |
| Present, n (%)                  | 22 (63%)    | 12 (80%)    |       |
| <b>HYPOGAMMAGLOBULINEMIA, n</b> | 17          | 11          |       |
| Absent, n (%)                   | 14 (82%)    | 10 (91%)    | > .99 |
| Present, n (%)                  | 3 (18%)     | 1 (9%)      |       |
| <b>HLH, n</b>                   | 40          | 20          |       |
| Absent, n (%)                   | 36 (90%)    | 15 (75%)    | .253  |
| Present, n (%)                  | 4 (10%)     | 5 (25%)     |       |
| <b>EBV LATENCY</b>              | 40          | 17          |       |
| Type II (LMP1+/EBNA2-), n (%)   | 36 (90%)    | 14 (82%)    | .415  |
| Type III (LMP1+/EBNA2+), n (%)  | 4 (10%)     | 3 (18%)     |       |

aalPI: age adjusted International Prognostic Index; ECOG-PS: Eastern Cooperative Oncology Group-Performans Status; EBNA2: EBV nuclear antigen 2; HLH: hemophagocytic lymphohistiocytosis; LDH: lactate dehydrogenase; LMP1: latent membrane protein 1; RT: radiation therapy.

\*Missing data (for 3 patients, microbiopsy was insufficient for histological classification)

**Table S8.** Baseline clinical and biological characteristics of EBV<sup>+</sup> DLBCL-NOS patients treated with intent-to-cure regimen vs palliative care (n=69\*).

| CHARACTERISTICS                 | INTENT-TO-CURE | PALLIATIVE | P      |
|---------------------------------|----------------|------------|--------|
| <b>TOTAL, n</b>                 | 56             | 13         |        |
| Median age, years               | 62.5           | 86         | <.0001 |
| Age ≤ 50 ans                    | 23 (41%)       | 0          | .003   |
| Age > 50 ans                    | 33 (59%)       | 13 (100%)  |        |
| Male                            | 39 (70%)       | 4 (30%)    | .013   |
| Female                          | 17 (30%)       | 9 (70%)    |        |
| <b>INVOLVED SITE, n</b>         | 56             | 10         |        |
| Nodal, n (%)                    | 55 (98%)       | 8 (80%)    | .058   |
| Extra-nodal, n (%)              | 26 (46%)       | 6 (60%)    | .505   |
| 1, n (%)                        | 11 (42%)       | 4 (67%)    |        |
| ≥ 2, n (%)                      | 15 (58%)       | 2 (33%)    |        |
| <b>CLINICAL STAGE, n</b>        | 56             | 10         |        |
| I-II, n (%)                     | 11 (20%)       | 2 (20%)    | >.99   |
| III-IV, n (%)                   | 45 (80%)       | 8 (80%)    |        |
| <b>aalPI, n</b>                 | 50             | 7          |        |
| 0-1, n (%)                      | 14 (28%)       | 1 (14%)    | .662   |
| 2-3, n (%)                      | 36 (72%)       | 6 (86%)    |        |
| <b>ECOG, n</b>                  | 56             | 9          |        |
| 0-1, n (%)                      | 29 (52%)       | 0          | .003   |
| 2-5, n (%)                      | 27 (48%)       | 9 (100%)   |        |
| <b>B SYMPTOMS, n</b>            | 55             | 9          |        |
| Absent, n (%)                   | 12 (22%)       | 2 (22%)    | >.99   |
| Present, n (%)                  | 43 (78%)       | 7 (78%)    |        |
| <b>LDH, n</b>                   | 50             | 7          |        |
| Normal, n (%)                   | 12 (24%)       | 2 (29%)    | >.99   |
| High, n (%)                     | 38 (76%)       | 5 (71%)    |        |
| <b>LYMPHOPENIA, n</b>           | 44             | 7          |        |
| Absent, n (%)                   | 15 (34%)       | 1 (14%)    | .410   |
| Present, n (%)                  | 29 (66%)       | 6 (86%)    |        |
| <b>HYPOGAMMAGLOBULINEMIA, n</b> | 34             | 3          |        |
| Absent, n (%)                   | 14 (41%)       | 2 (67%)    | .568   |
| Present, n (%)                  | 20 (59%)       | 1 (33%)    |        |
| <b>HLH, n</b>                   | 56             | 8          |        |
| Absent, n (%)                   | 48 (86%)       | 7 (88%)    | >.99   |
| Present, n (%)                  | 8 (14%)        | 1 (12%)    |        |
| <b>EBV LATENCY</b>              | 49             | 7          |        |
| Type II (LMP1+/EBNA2-), n (%)   | 43 (88%)       | 6 (86%)    | >.99   |
| Type III (LMP1+/EBNA2+), n (%)  | 6 (12%)        | 1 (14%)    |        |

aalPI: age adjusted International Prognostic Index; ECOG-PS: Eastern Cooperative Oncology Group-Performans Status; EBNA2: EBV nuclear antigen 2; HLH: hemophagocytic lymphohistiocytosis; LDH: lactate dehydrogenase; LMP1: latent membrane protein 1; RT: radiation therapy.

\*Missing data (for 1 patient, treatment regimen not available)

**Table S9. First-line regimen received by EBV<sup>+</sup> DLBCL-NOS patients treated with curative intent (n=56).**

|                                                                                                                     |                 |
|---------------------------------------------------------------------------------------------------------------------|-----------------|
| <b>IMMUNOCHEMOTHERAPY ± RT, n (%)</b>                                                                               | <b>41 (73%)</b> |
| R-CHOP-like (rituximab, cyclophosphamide, doxorubicin, vincristine, prednisone), n (%)                              | 24 (59%)        |
| R-ACVBP (rituximab, cyclophosphamide, doxorubicin, vindesine, bleomycine, prednisone), n (%)                        | 13 (31%)        |
| Others, n (%)                                                                                                       | 4 (10%)         |
| R-BEACOPP (rituximab, bleomycin, etoposide, doxorubicin, cyclophosphamide, vincristine, procarbazine, prednisolone) | 1               |
| R-ABVD (rituximab, bleomycin, dacarbazine, doxorubicin, vinblastine)                                                | 1               |
| R-PVAG (rituximab, prednisone, vinblastine, doxorubicin, gemcitabine)                                               | 1               |
| COP and R-anti-CD25 immunotoxin (LMB2)                                                                              | 1               |
| <b>CHEMOTHERAPY ± RT, n (%)</b>                                                                                     | <b>15 (27%)</b> |
| BEACOPP (bleomycin, etoposide, doxorubicin, cyclophosphamide, vincristine, procarbazine, prednisolone), n (%)       | 5 (33%)         |
| ABVD (bleomycin, dacarbazine, doxorubicin, vinblastine), n (%)                                                      | 5 (33%)         |
| COPDAC (cyclophosphamide, vincristine, prednisone et dacarbazine), n (%)                                            | 1 (7%)          |
| COP (cyclophosphamide, vincristine, prednisone), n (%)                                                              | 4 (27%)         |

RT: radiation therapy

**Table S10. Salvage regimen and outcome for relapsed/refractory EBV<sup>+</sup> DLBCL-NOS treated with curative intent (n=56).**

| RELAPSED/REFRACTORY EBV <sup>+</sup> DLBCL-NOS (n=14) |                       | OUTCOME             | PFS (months) | OS (months) |
|-------------------------------------------------------|-----------------------|---------------------|--------------|-------------|
| <b>Refractory to first-line therapy, n (%)</b>        |                       | 10 (71%)            |              |             |
| Patient 1                                             | R-GEMOX               | Death from lymphoma | 1.93         | 5.41        |
| Patient 2                                             | R-GEMOX               | Death from lymphoma | 8.92         | 14.33       |
| Patient 3                                             | R-GEMOX               | Death from lymphoma | 2.69         | 26.49       |
| Patient 4                                             | R-GEMOX               | Remission           | 5.80         | 39.10       |
| Patient 5                                             | R-ICE                 | Death from lymphoma | 1.93         | 7.18        |
| Patient 6                                             | No treatment          | Death from lymphoma | .56          | .56         |
| Patient 7                                             | No treatment          | Death from lymphoma | .16          | .16         |
| Patient 8                                             | No treatment          | Death from lymphoma | .30          | .30         |
| Patient 9                                             | No treatment          | Death from lymphoma | .95          | .95         |
| Patient 10                                            | Missing data          | Death from lymphoma | 6.30         | 7.67        |
| <b>Relapse after first-line therapy, n (%)</b>        |                       | 4 (29%)             |              |             |
| Patient 11                                            | R-DHAOx               | Death from lymphoma | 13.84        | 14.85       |
| Patient 12                                            | IVOX followed by ASCT | Remission           | 164.69       | 219.97      |
| Patient 13                                            | R-Holoxan VP16        | Death from lymphoma | 15.61        | 28.33       |
| Patient 14                                            | Missing data          | Death from lymphoma | 1.92         | 1.92        |

ASCT: autologous stem cell transplantation; IVOX: ifosfamide, etoposide, oxaliplatin; PFS: progression free survival, OS: overall survival; R-GEMOX: rituximab, gemcitabine, oxaliplatin; R-DHAOx: rituximab, dexamethasone, high-dose cytarabine, oxaliplatin; R-ICE: rituximab, ifosfamide, carboplatin, etoposide.

**Table S11. Univariate Cox proportional hazard regression in EBV<sup>+</sup> DLBCL-NOS (n=56 with curative-intent regimen).**

| VARIABLE                | PFS                        |        | OS                        |        |
|-------------------------|----------------------------|--------|---------------------------|--------|
|                         | HR (IC 95%)                | P      | HR (IC 95%)               | P      |
| HLH                     | <b>1.58 (3.96,28.23)</b>   | < .001 | <b>14.01 (4.99,39.39)</b> | < .001 |
| ECOG-PS ≥ 2             | <b>11.78 (3.03, 45.73)</b> | < .001 | <b>1.92 (2.49,47.81)</b>  | .002   |
| aalPI ≥ 2               | <b>9.23 (1.22,69.7)</b>    | .031   | -                         | > .99  |
| Age > 50 ans            | <b>7.29 (1.78,29.82)</b>   | .006   | <b>6.27 (1.43,27.42)</b>  | .015   |
| Extra nodal disease     | <b>3.16 (1.21,8.28)</b>    | .019   | <b>3.20 (1.12,9.13)</b>   | .030   |
| Clinical stage III – IV | 6.58 (.88,49.47)           | .067   | -                         | .999   |
| LDH elevated            | 2.72 (.62,11.88)           | .180   | 5.26 (.69,4.09)           | .109   |
| Lymphopenia             | 2.01 (.56,7.22)            | .280   | 2.84 (.62,12.96)          | .189   |
| Latency type III        | 2.25 (.68,7.47)            | .180   | 2.40 (.66,8.71)           | .190   |
| PD-L1 H-score > 150     | .59 (.19,1.83)             | .360   | .48 (.15,1.54)            | .220   |
| Polymorphic             | .47 (.19,1.16)             | .100   | .47 (.18,1.23)            | .130   |
| Female                  | .33 (.10,1.12)             | .076   | .4 (.11,1.39)             | .150   |
| B symptoms              | -                          | >.99   | -                         | .988   |

aalPI: age adjusted International Pronostic Index; ECOG-PS: Eastern Cooperative Oncology Group-Performans Status; HLH: hemophagocytic lymphohistiocytosis; HR: hazard ratio; H-score: histoscore; LDH: lactate dehydrogenase; PD-L1: programmed death ligand 1.

**Table S12.** Baseline clinical and biological characteristics in 56 EBV<sup>+</sup> DLBCL-NOS patients compared with 425 EBV<sup>-</sup> DLBCL-NOS with intent-to-cure therapy.

| CHARACTERISTIC            | DLBCL-NOS (n=481) |              | P      | DLBCL-NOS > 50 years (n=392) |              | P      | DLBCL-NOS ≤ 50 years (n=89) |                | P      |
|---------------------------|-------------------|--------------|--------|------------------------------|--------------|--------|-----------------------------|----------------|--------|
|                           | EBV+              | EBV-         |        | EBV+                         | EBV-         |        | EBV+                        | EBV-           |        |
| <b>TOTAL, n</b>           | 56                | 425          |        | 33                           | 359          |        | 23                          | 66             |        |
| Median age (range), years | 62.5 (16 – 86)    | 67 (20 – 97) | .008   | 73 (52 – 86)                 | 70 (51 – 97) | .293   | 37 (16 – 50)                | 39.5 (20 – 50) | .051   |
| Age ≤ 50 years, n (%)     | 23 (41%)          | 66 (16%)     | <.0001 | -                            | -            |        | -                           | -              |        |
| Age > 50 years, n (%)     | 33 (59%)          | 359 (85%)    |        | -                            | -            |        | -                           | -              |        |
| Male, n (%)               | 39 (70%)          | 276 (65%)    | .551   | 25 (76%)                     | 229 (64%)    | .187   | 14 (60%)                    | 47 (71%)       | .436   |
| Female, n (%)             | 17 (30%)          | 149 (35%)    |        | 8 (24%)                      | 130 (36%)    |        | 9 (40%)                     | 19 (29%)       |        |
| <b>CLINICAL STAGE, n</b>  | 56                | 404          |        | 33                           | 343          |        | 23                          | 61             |        |
| I-II, n (%)               | 11 (20%)          | 90 (22%)     | .733   | 4 (12%)                      | 72 (21%)     | .265   | 7 (30%)                     | 18 (30%)       | >.99   |
| III-IV, n (%)             | 45 (80%)          | 314 (78%)    |        | 29 (88%)                     | 271 (79%)    |        | 16 (70%)                    | 43 (70%)       |        |
| <b>aaIPI, n</b>           | 50                | 315          |        | 28                           | 276          |        | 22                          | 39             |        |
| 0-1, n (%)                | 14 (28%)          | 98 (31%)     | .869   | 4 (14%)                      | 83 (30%)     | .084   | 10 (45%)                    | 15 (38%)       | .601   |
| 2-3, n (%)                | 36 (72%)          | 217 (69%)    |        | 24 (86%)                     | 193 (70%)    |        | 12 (55%)                    | 24 (62%)       |        |
| <b>ECOG-PS, n</b>         | 56                | 347          |        | 33                           | 303          |        | 23                          | 44             |        |
| 0-1, n (%)                | 29 (52%)          | 242 (70%)    | .013   | 10 (30%)                     | 204 (67%)    | <.0001 | 19 (83%)                    | 38 (86%)       | .726   |
| 2-5, n (%)                | 27 (48%)          | 105 (30%)    |        | 23 (70%)                     | 99 (33%)     |        | 4 (17%)                     | 6 (14%)        |        |
| <b>B SYMPTOME, n</b>      | 55                | 268          |        | 32                           | 231          |        | 23                          | 37             |        |
| Absent, n (%)             | 12 (22%)          | 181 (68%)    | <.0001 | 6 (19%)                      | 151 (65%)    | <.0001 | 6 (26%)                     | 30 (81%)       | <.0001 |
| Present, n (%)            | 43 (78%)          | 87 (32%)     |        | 26 (81%)                     | 80 (35%)     |        | 17 (74%)                    | 7 (19%)        |        |
| <b>LDH, n</b>             | 50                | 357          |        | 28                           | 308          |        | 22                          | 49             |        |
| Normal, n (%)             | 12 (24%)          | 74 (21%)     | .582   | 6 (21%)                      | 61 (20%)     | .807   | 6 (27%)                     | 13 (27%)       | >.99   |
| Elevated, n (%)           | 38 (76%)          | 283 (79%)    |        | 22 (79%)                     | 247 (80%)    |        | 16 (73%)                    | 36 (73%)       |        |

aaIPI : age adjusted International Pronostic Index; ECOG-PS: Eastern Cooperative Oncology Group-Performans Status; LDH: lactate dehydrogenase.
